# Supplementary material for: Increased use of diagnostic CT imaging increases the detection of stage IA lung cancer: pathways and patient characteristics
Source: BMC Cancer. 2022 Apr 27;22:464. doi: 10.1186/s12885-022-09585-2 (PMC9047294; doi:10.1186/s12885-022-09585-2)
Supplement: Supplementary file 1 — Additional file 1: Supplementary table 1.Logistic regression analysis of 294 lung cancer patients, Silkeborg Regional Hospital 2016-2018. Multivariate analysis example. [file 12885_2022_9585_MOESM1_ESM.xlsx]

## Sheet: Table 2
Supplementary table 1. Logistic regression analysis of 294 lung cancer patients, Silkeborg Regional Hospital 2016-2018. Multivariate analysis example.
Outcome is cTNM stage IA.
	cTNM
	IA	Higher			Univariate models				Adjusted models**
	(85)	(209)	%IA		OR	95% CI			OR	95% CI
Patient characteristics and constitution
Age at diagnosis
	Median	Median
	72	69.9
-59	10	29	25.641		0.6	0.27	1.35		0.48	0.2	1.11
60-69	26	76	25.4902		0.59	0.33	1.07		0.59	0.32	1.07
70-79	42	73	36.5217		1				1
≥80	7	31	18.4211		0.39	0.16	0.97		0.42	0.16	1.09
					Chi2(3)=5.9; p=0.11				Chi2(3)=6.1; p=0.11
Sex
Male	40	120	25		1				1
Female	45	89	33.5821		1.52	0.91	2.52		1.32	0.77	2.26
					Chi2(1)=2.6; p=0.11				Chi2(1)=1.0; p=0.32
Charlson comorbidity score
0	29	99	22.6562		1				1
1	21	47	30.8824		1.53	0.79	2.95		1.75	0.87	3.54
2	19	22	46.3415		2.95	1.41	6.18		4.68	2.05	10.72
≥3	16	41	28.0702		1.33	0.65	2.71		1.54	0.72	3.3
					Chi2(3)=8.3; p=0.04				Chi2(3)=13.5; p=0.004
Pack-years
≥40	32	99	24.4275		1				1
20-39	33	76	30.2752		1.34	0.76	2.38		1.33	0.73	2.42
10-19	9	14	39.1304		1.99	0.79	5.03		2.19	0.84	5.7
0-9	10	8	55.5556		3.87	1.41	10.63		3.97	1.39	11.34
NA	1	12	7.69231		0.26	0.03	2.06		0.31	0.04	2.59
					Chi2(3)=7.9; p=0.048 (ex. NA)				Chi2(3)=8.2; p=0.042 (ex. NA)
Morphology
Small cell carcinoma	2	29	6.45161		0.12	0.03	0.52		0.14	0.03	0.62
Adenocarcinoma	57	99	36.5385		1				1
Squamous cell carcinoma	9	39	18.75		0.4	0.18	0.89		0.45	0.2	1.03
NSCLC unspecified	8	24	25		0.58	0.24	1.37		0.72	0.28	1.82
Other and NA	9	18	33.3333		0.87	0.37	2.06		0.81	0.32	2
					Chi2(4)=12.6; p=0.01				Chi2(4)=9.3; p=0.054
Referral
Initiation of referral
General practice	38	127	23.0303		0.52	0.31	0.87		0.52	0.3	0.88
Hospital	47	82	36.4341		1				1
					Chi2(1)=6.2; p=0.01				Chi2(1)=5.8; p=0.02
Red flag symptoms (PPV, %)*
0	34	63	35.0515		1.36	0.78	2.37		1.39	0.77	2.49
0.1-0.9	39	98	28.4672		1				1
≥1	12	48	20		0.63	0.3	1.31		0.71	0.33	1.51
					Chi2(2)=4.0; p=0.13				Chi2(2)=3.0; p=0.22
Diagnostics
Initial imaging conclusion
Suspicious for cancer	40	176	18.5185		1				1
Referral for follow-up	36	24	60		6.6	3.55	12.27		7.11	3.69	13.69
Non-suspicious	9	9	50		4.4	1.64	11.79		4.11	1.43	11.82
					Chi2(2)=38.9; p<0.001				Chi2(2)=36.9; p<0.001
Index image
CECT	19	46	29.2308		1				1
LDCT	25	37	40.3226		1.64	0.78	3.42		1.64	0.76	3.54
Xray	23	87	20.9091		0.64	0.32	1.3		0.62	0.29	1.29
None of the above	18	39	31.5789		1.12	0.52	2.42		0.92	0.4	2.09
					Chi2(3)=7.4; p=0.06				Chi2(3)=7.2; p=0.07
Imaging cascade
CECT direct	16	42	27.5862		1				1
LDCT or ULDCT	22	40	35.4839		1.44	0.66	3.14		1.33	0.59	2.97
Xray then CECT	9	66	12		0.36	0.15	0.88		0.3	0.11	0.78
Xray then LDCT	21	28	42.8571		1.97	0.88	4.41		1.71	0.74	3.94
Other	17	33	34		1.35	0.6	3.07		1.04	0.43	2.53
					Chi2(4)=15.5; p=0.004				Chi2(4)=14.3; p=0.006
Clinical pathway
Pathway
Lung cancer referral pathway	5	19	20.8333		1				1
Urgent referral pathway for non-specific serious symptoms	12	33	26.6667		1.38	0.42	4.52		1.41	0.41	4.86
LDCT pathway	25	37	40.3226		2.57	0.85	7.78		2.7	0.85	8.57
Not a defined clinical pathway	43	120	26.3804		1.36	0.48	3.87		1.32	0.44	3.92
					Chi2(3)=5.2; p=0.16				Chi2(3)=5.7; p=0.13
Timing of investigation and diagnosis
Days from investigation to diagnosis
Less than 31	42	180	18.9189		1				1
31-60	8	11	42.1053		3.12	1.18	8.23		3.55	1.25	10.08
61-179	12	8	60		6.43	2.47	16.72		6.23	2.28	17.01
≥180	23	10	69.697		9.86	4.36	22.27		11.27	4.74	26.8
					Chi2(3)=41.1; p<0.001				Chi2(3)=39.3; p<0.001
Six patients with missing value for clinical stage are not included.
* Red flag symptoms: none, cough, fatigue, dyspnoea, chest pain, loss of weight, loss of appetite, abnormal spirometry, thrombocytosis, and haemoptysis
** All adjusted models include age, sex and pack-years.
